# Supplementary material for: Structurally characterized luminescent lanthanide zinc carboxylate precursors for Ln–Zn–O nanomaterials
Source: Royal Society of Chemistry journal article supplement (doi:10.1039/c002492a), 2010-01-01

*Supplemental Information for:*

**Structurally Characterized Luminescent Lanthanide Zinc Carboxylate Precursors for Ln-  
Zn-O Nanomaterials**

*by*

Timothy J. Boyle, Rebecca Raymond, Daniel M. Boye, Leigh Anna M. Ottley, Ping Lu

**List of Figures :**

**Figure S1.** TEM images of Ln-Zn-O nanoparticles synthesized from: (a) **8** and (b) **18**.

**Figure S2.** XRD patterns of Ln-Zn-O nanoparticles synthesized from: (a) **8** and (b) **18**.

**Figure S3.** EDS patterns of Ln-Zn-O nanoparticles synthesized from: (a) **8** and (b) **18**.

**Figure S4.** TEM images of Ln-Zn-O nanoparticles synthesized from: (a) **10** and (b) **22**.

**Figure S5.** XRD patterns of Ln-Zn-O nanoparticles synthesized from: (a) **10** and (b) **22**.

**Figure S6.** EDS patterns of Ln-Zn-O nanoparticles synthesized from: (a) **10** and (b) **22**.

**Figure S7.** TGA/DTA of **8**, **10**, and **18**.

**Figure S8.** PXRD of fired (400 °C) nanoparticles of **8** and **18**.

**Figure SS1.** TEM images of Ln-Zn-O nanoparticles synthesized from: (a) **8** and (b) **18**.

(a)

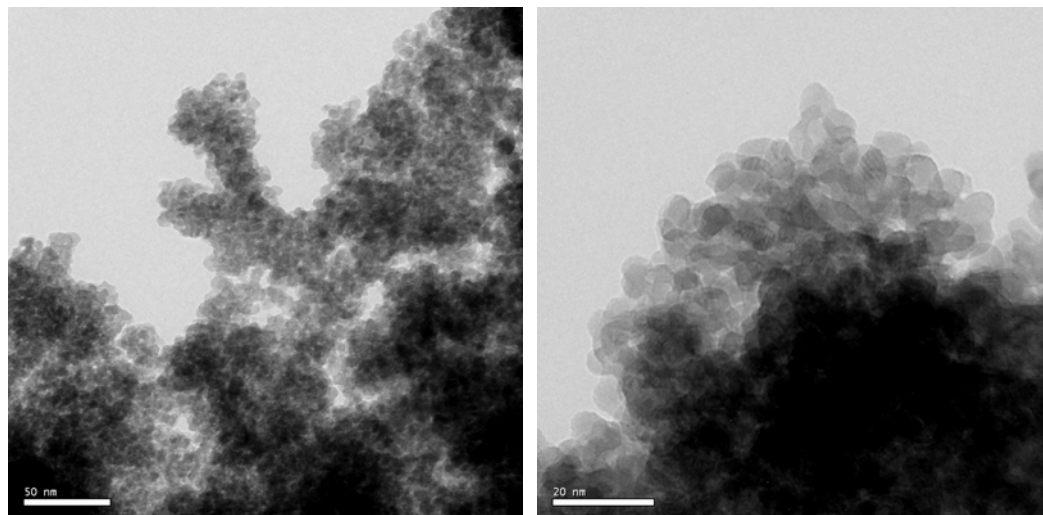

(b)

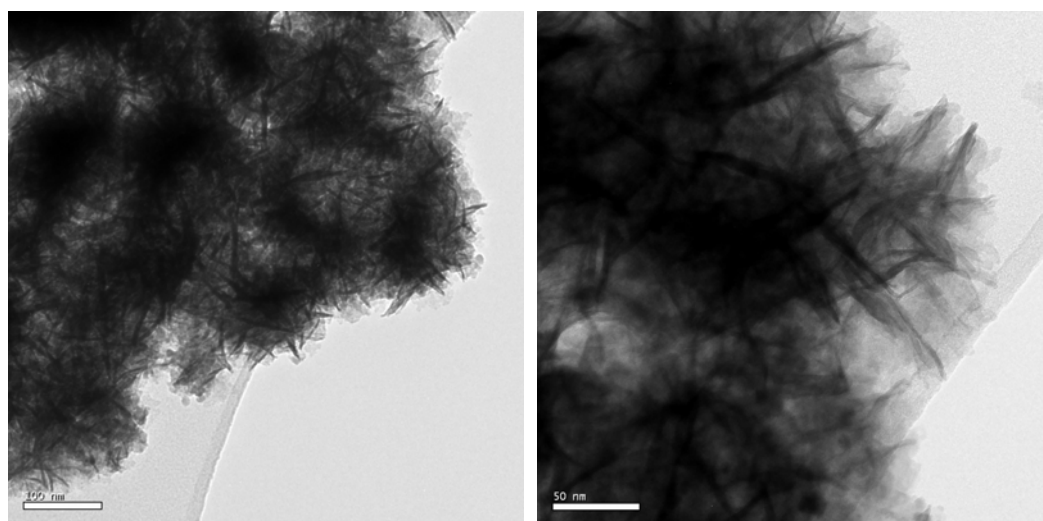

**Figure SS2.** XRD patterns of Ln-Zn-O nanoparticles synthesized from: (a) **8** and (b) **18**. Zincite pattern shown below

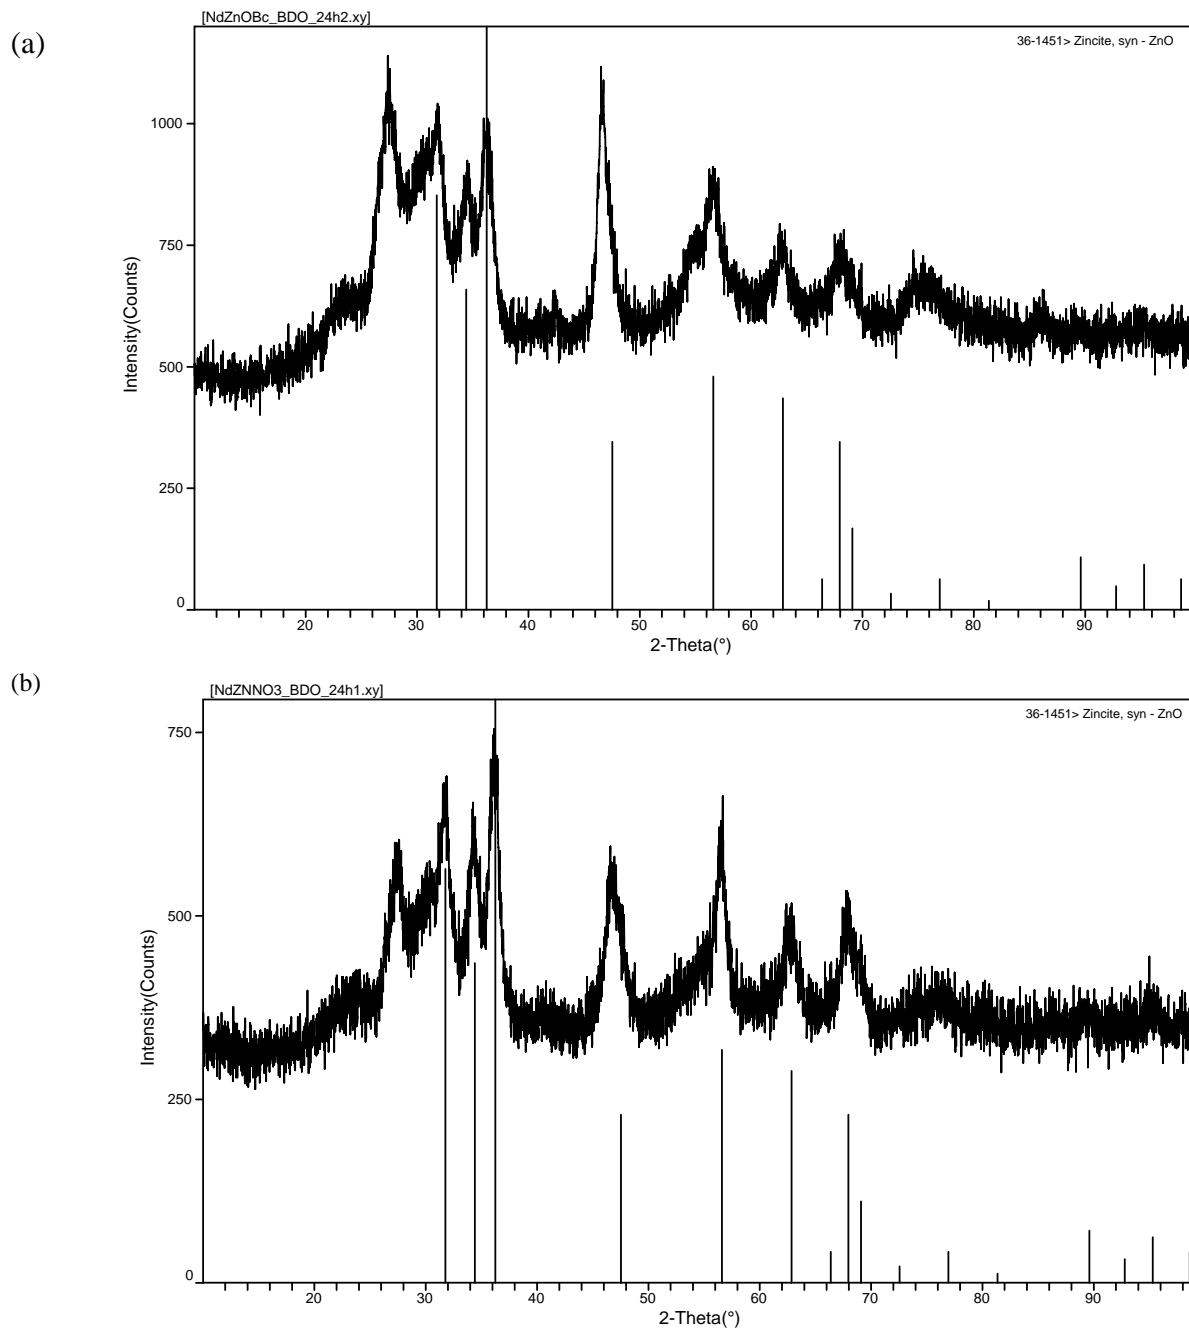

**Figure S3.** EDS patterns of Ln-Zn-O nanoparticles synthesized from: (a) **8** and (b) **18**.

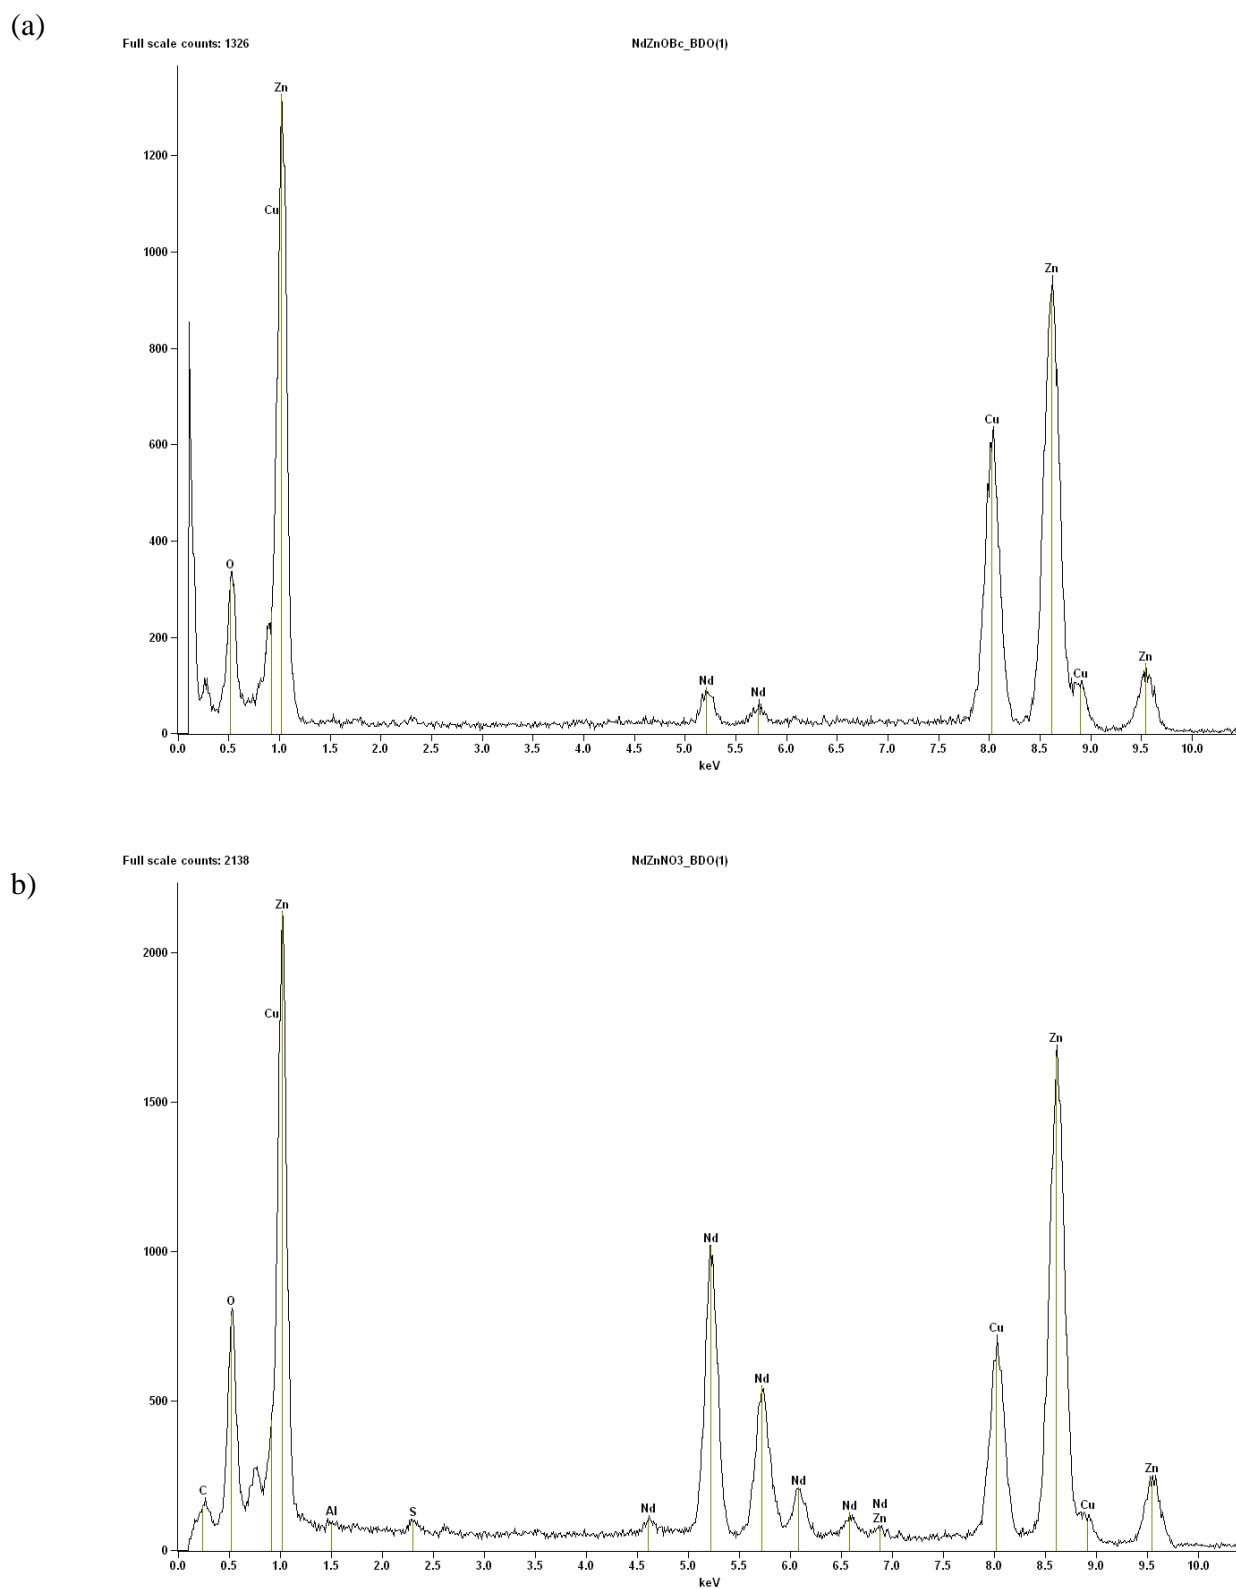

**Figure S4.** TEM images of Ln-Zn-O nanoparticles synthesized from: (a) **10** (b) **22**.

(a)

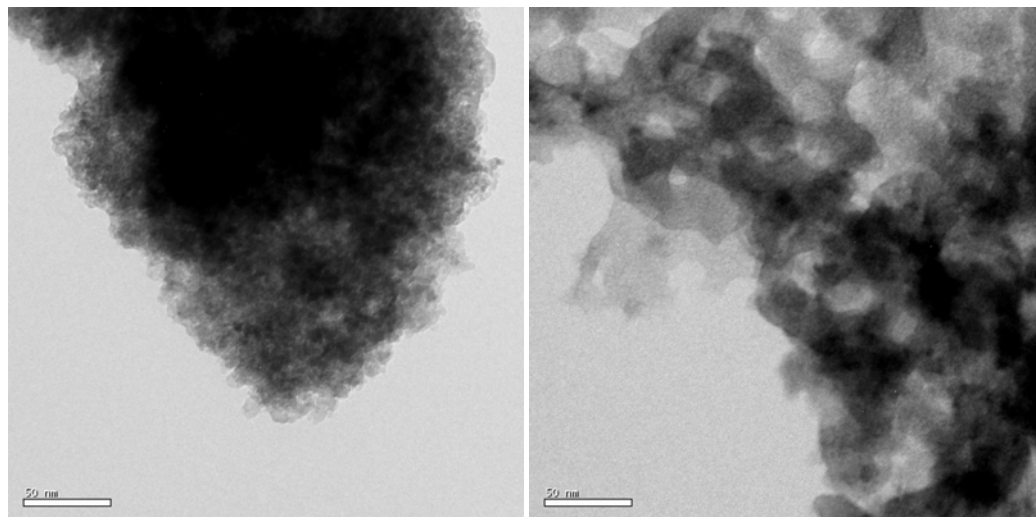

(b)

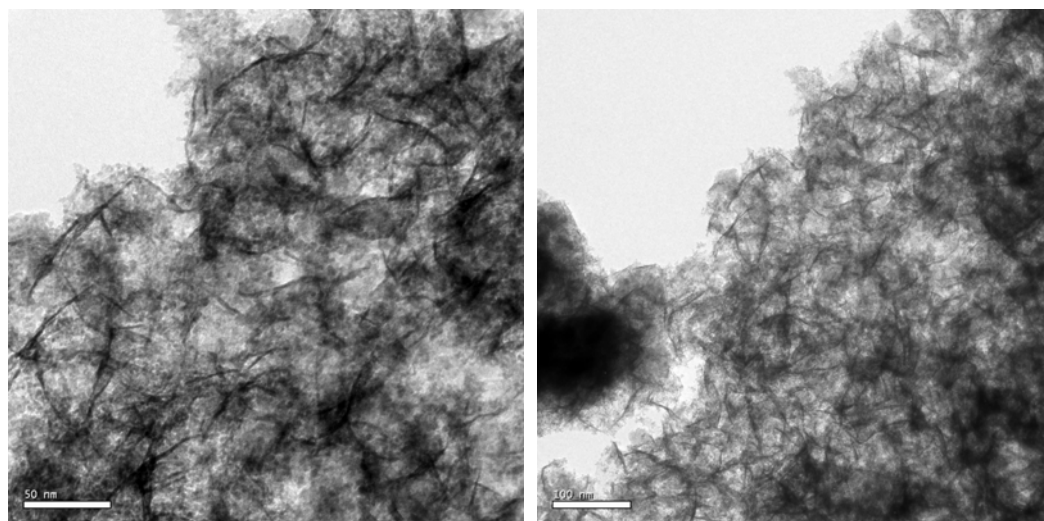

**Figure S5.** XRD patterns of Ln-Zn-O nanoparticles synthesized from: (a) **10** and (b) **22**. Zincite pattern shown below

(a)

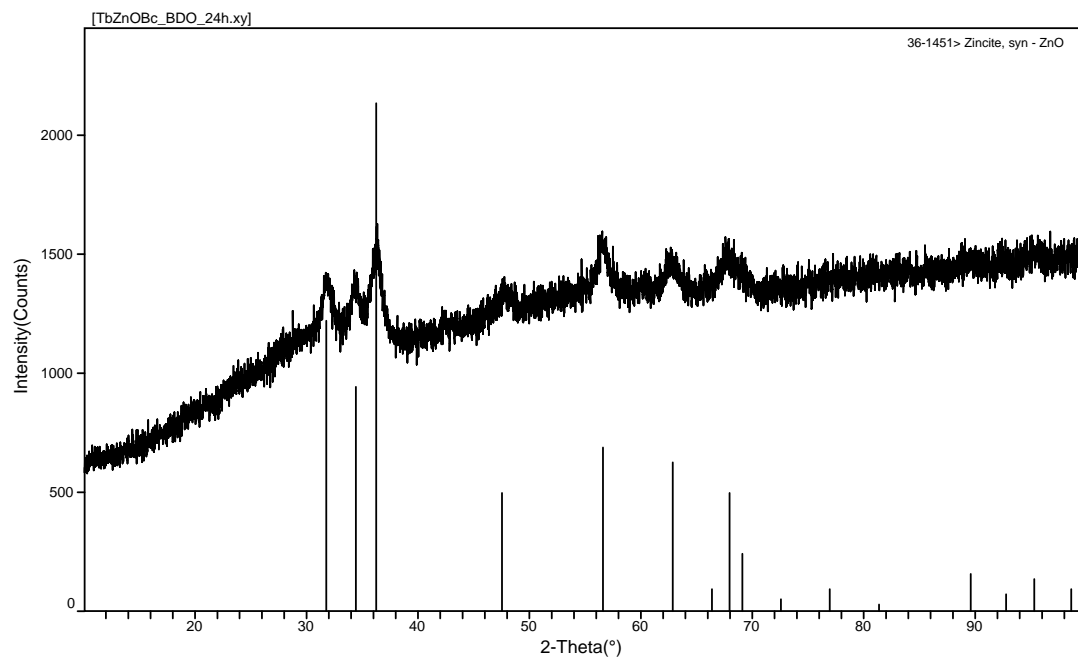

(b)

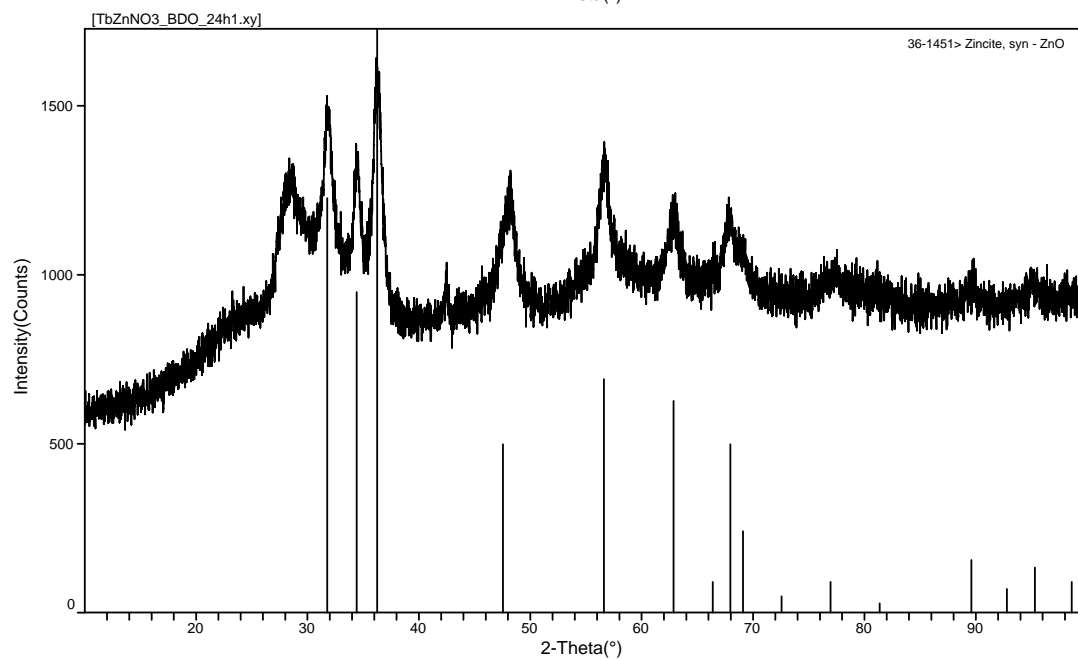

**Figure S6.** EDS patterns of Ln-Zn-O nanoparticles synthesized from: (a) **10** and (b) **22**.

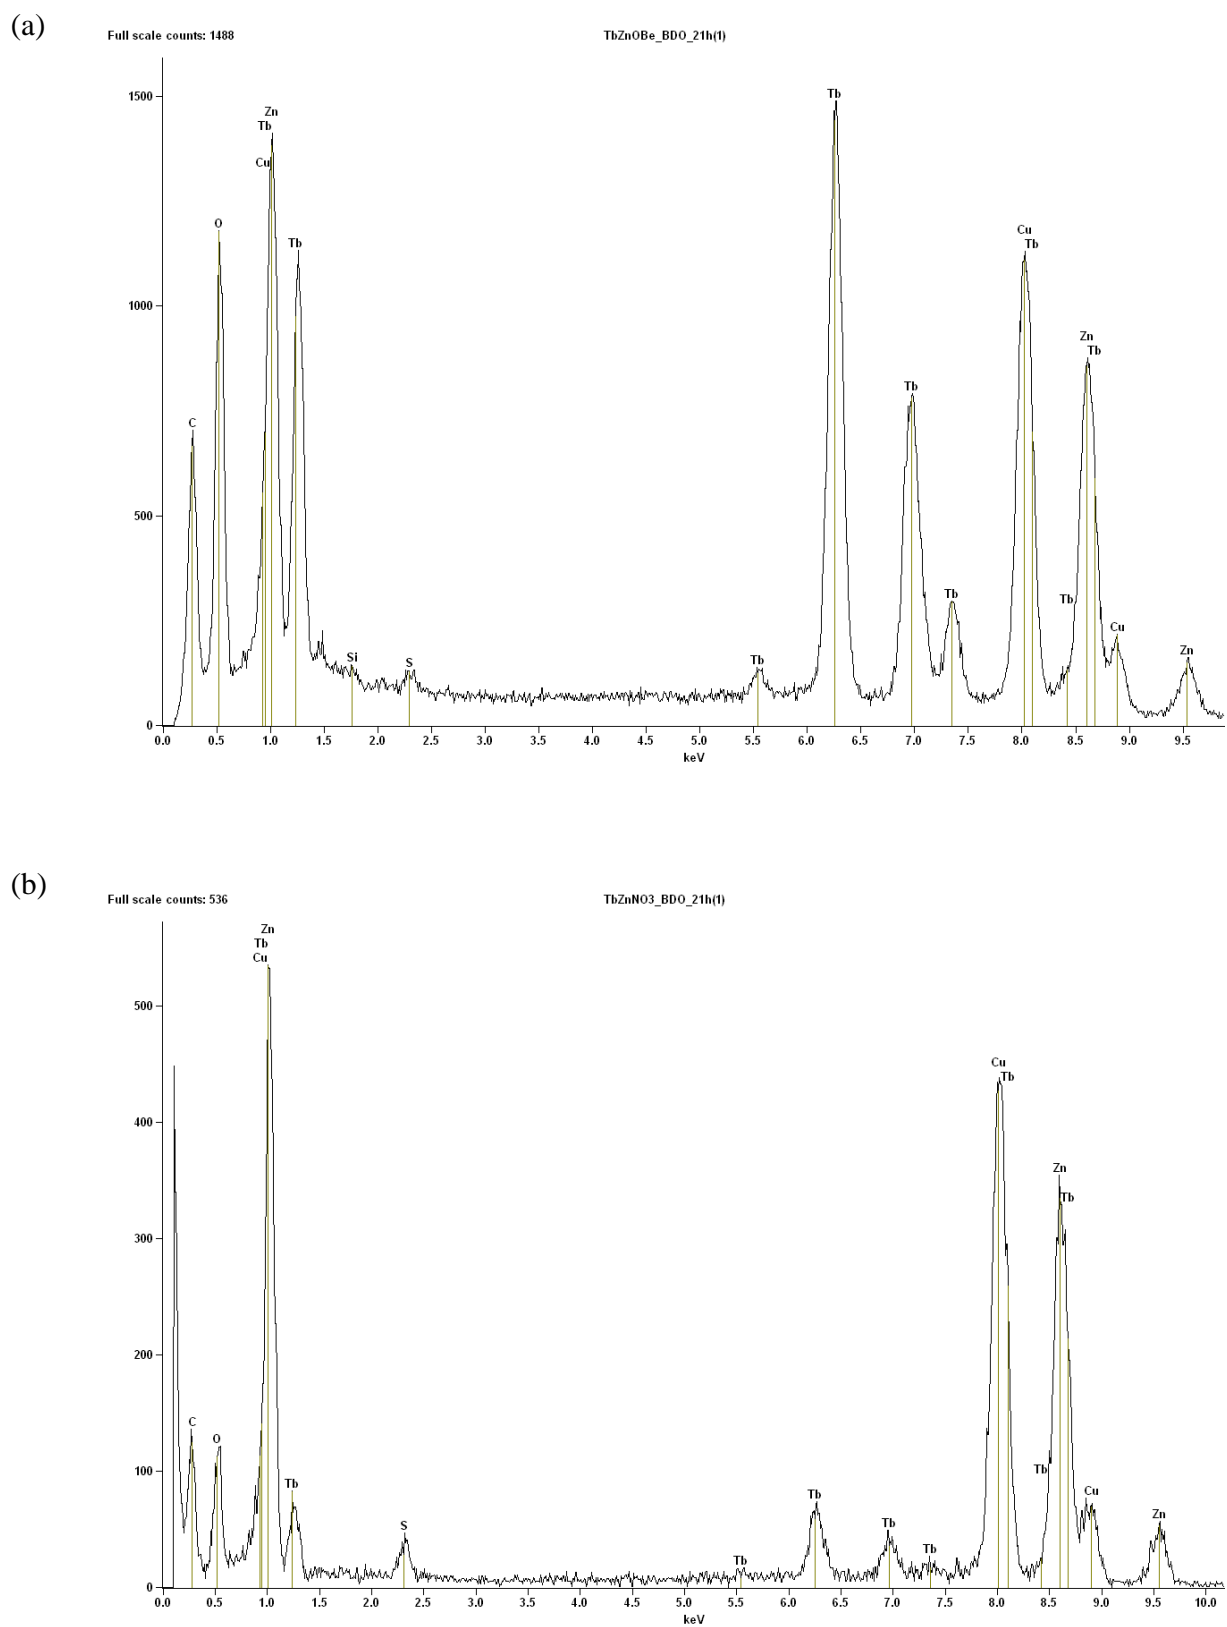



**Figure S7. TGA/DTA of 8, 10, and 18.**

(a)

QuickTime™ and a  
TIFF (Uncompressed) decompressor  
are needed to see this picture.

(b)

QuickTime™ and a  
TIFF (Uncompressed) decompressor  
are needed to see this picture.

(c)

QuickTime™ and a  
TIFF (Uncompressed) decompressor  
are needed to see this picture.

**Figure S8.** PXRD of fired (400 °C) nanoparticles of **8** and **18**.

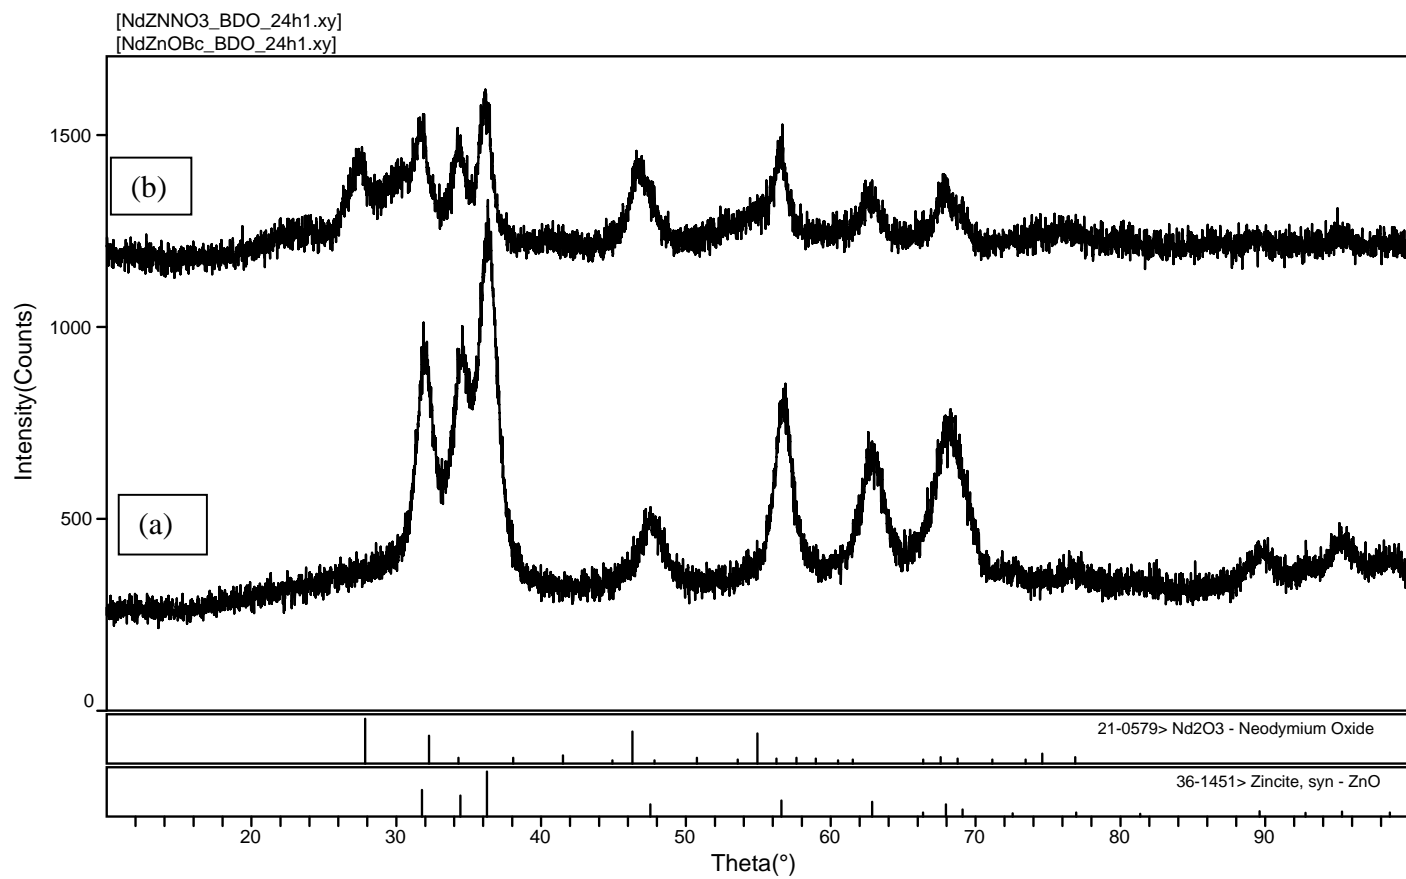

Supplement: c002492a.pdf [file c002492a.pdf]
